# Supplementary material for: iTRAQ-Based Phosphoproteomic Analysis of Toxoplasma gondii Tachyzoites Provides Insight Into the Role of Phosphorylation for its Invasion and Egress
Source: Front Cell Infect Microbiol. 2020 Nov 26;10:586466. doi: 10.3389/fcimb.2020.586466 (PMC7756149; doi:10.3389/fcimb.2020.586466)
Supplement: Supplementary Table 1 — qPCR primers for the transcription level detection of the genes with their protein’s phosphorylation level significantly changed. [file Table_1.xlsx]

## Sheet: Sheet1
Gene_ID	Gene Name	Primer Sequence
TGGT1_311480	hypothetical protein	GAGATCAACGACCCTGAAG
		GCCCTGTTGGTACTCTCTTTC
TGGT1_288650	dense granule protein GRA12	CAAGAAGCGAAGAACAGAAC
		CCACAGATCGAGGTAGAGTAC
TGGT1_231630	alveolin domain containing intermediate filament IMC4	TTGAGCTCGGAACCATG
		GTGTTCCTTGGACCAGC
TGGT1_273460	eukaryotic translation initiation factor 3 subunit 6 interacting protein	CGTTCGAAGCCAACAATC
		GAGCAGAGTTCTGAATGGAG
TGGT1_230940	hypothetical protein	GAAGCAAGCAATACCACG
		GTACTGTCCGTAGCTGTAGCC
TGGT1_227620	dense granule protein GRA2	GATGAGAGAGCAGTTGGAGG
		CTGCCACTCTGGATGCACG
TGGT1_257530	transporter, major facilitator family protein	CACCAACCGACTGGTGCTG
		CTTGGGCTTTGTTCACAC
TGGT1_227280	dense granule protein GRA3	CGACAAGTGCAGCGATAG
		GGTAAGAACTTTGCGAATGTAG
TGGT1_239800	hypothetical protein	CTTCTCCAGGAGACTGCC
		GGTACAGCGACAAGCTGG
TGGT1_228360	putative peptidyl-prolyl isomerase FKBP12	CAGCAGCCGTTTACATG
		CAGGGATGGAAATACGTC
TGGT1_209030	Actin	GACATCAAGGAGAAGCTTTG
		CAATTCATAGGACTTCTCGATG
